1     **The impact of early life experiences and gut microbiota on neurobehavioral development**  
2                     **among preterm infants: A longitudinal cohort study**

3  
4     Jie Chen, PhD, RN, [jc22db@fsu.edu](mailto:jc22db@fsu.edu)<sup>1,2</sup>  
5     <https://orcid.org/0000-0002-1568-8974>

6  
7     Hongfei Li, PhD, [hongfei.2.li@uconn.edu](mailto:hongfei.2.li@uconn.edu)<sup>3</sup>,  
8     <https://orcid.org/0000-0001-5359-2853>

9  
10    Tingting Zhao, PhD, RN, [tingting.zhao@uconn.edu](mailto:tingting.zhao@uconn.edu)<sup>2</sup>

11  
12    Kun Chen, PhD, [kun.chen@uconn.edu](mailto:kun.chen@uconn.edu)<sup>3</sup>

13  
14    Ming-Hui Chen, PhD, [ming-hui.chen@uconn.edu](mailto:ming-hui.chen@uconn.edu)<sup>3</sup>  
15    <https://orcid.org/0000-0003-1935-2447>

16  
17    Zhe Sun, PhD, [zhe.sun@yale.edu](mailto:zhe.sun@yale.edu)<sup>3,4</sup>

18  
19    Wanli Xu, PhD, RN, [wanli.xu@uconn.edu](mailto:wanli.xu@uconn.edu)<sup>2</sup>  
20    <https://orcid.org/0000-0001-5664-6685>

21  
22    Kendra Maas, PhD, [kendra.maas@uconn.edu](mailto:kendra.maas@uconn.edu)<sup>5</sup>

23  
24    Barry Lester, MD, [barry\\_lester@brown.edu](mailto:barry_lester@brown.edu)<sup>6</sup>

25  
26    Xiaomei Cong, PhD, RN, FAAN, [xiaomei.cong@yale.edu](mailto:xiaomei.cong@yale.edu)<sup>7,2,8\*</sup>  
27    <https://orcid.org/0000-0002-4992-199X>

28  
29    <sup>1</sup> Florida State University College of Nursing, Tallahassee, FL., United States

30  
31    <sup>2</sup> School of Nursing, University of Connecticut, Storrs, CT., United States

32  
33    <sup>3</sup> Department of Statistics, University of Connecticut, Storrs, CT., United States

34  
35    <sup>4</sup> Department of Biostatistics, Yale School of Public Health, New Haven, CT., United States

36  
37    <sup>5</sup> University of Connecticut, Microbial Analysis, Resources, and Services (MARS), Storrs, CT.,  
38    United States

39  
40    <sup>6</sup> Brown Center for the Study of Children at Risk, Departments of Psychiatry and Pediatrics,  
41    Warren Alpert Medical School of Brown University, Providence, RI., United States.

42  
43    <sup>7</sup> Yale University School of Nursing, Orange, CT., United States.

44  
45    <sup>8</sup> Institute for Systems Genomics, University of Connecticut, Farmington, CT., United States.

46    \* **Correspondence:**

47 Xiaomei S. Cong, PhD, RN, FAAN  
48 Professor and Associate Dean for Research  
49 Yale University, School of Nursing  
50 400 West Campus Drive,  
51 Orange, CT 06477  
52 Tel: 203-737-4916  
53 Email: [xiaomei.cong@yale.edu](mailto:xiaomei.cong@yale.edu)  
54 University of Connecticut School of Nursing  
55 231 Glenbrook Road, Unit 4026  
56 Storrs, CT 06269-4026. USA  
57 Email: [xiaomei.cong@uconn.edu](mailto:xiaomei.cong@uconn.edu)

### 58 59 **Abstract**

60 **Objectives:** To investigate the impact of early life experiences and gut microbiota on  
61 neurobehavioral development among preterm infants during neonatal intensive care unit (NICU)  
62 hospitalization.

63 **Methods:** Preterm infants were followed from the NICU admission until their 28<sup>th</sup> postnatal day  
64 or until discharge. Daily stool samples, painful/stressful experiences, feeding patterns, and other  
65 clinical and demographic data were collected. Gut microbiota was profiled using 16S rRNA  
66 sequencing, and operational taxonomic units (OTUs) were selected to predict the neurobehaviors.  
67 The neurobehavioral development was assessed by the Neonatal Neurobehavioral Scale (NNNS)  
68 at 36 to 38 weeks of post-menstrual age (PMA). Fifty-five infants who had NNNS measurements  
69 were included in the sparse log-contrast regression analysis.

70 **Results:** Preterm infants who experienced high level of pain/stress during the NICU  
71 hospitalization that were associated with higher NNNS stress/abstinence scores. Eight  
72 operational taxonomic units (OTUs) were identified to be associated with of NNNS subscales  
73 after controlling demographic and clinical features, feeding patterns, and painful/stressful  
74 experiences. These OTUs, taxa belong to seven genera including  
75 *Enterobacteriaceae\_unclassified*, *Escherichia-Shigella*, *Incertae\_Sedis*, *Veillonella*,  
76 *Enterococcus*, *Clostridium\_sensu\_stricto\_1*, and *Streptococcus* with five belonging to *Firmicutes*  
77 and two belonging to *Proteobacteria* phylum. The enriched abundance of  
78 *Enterobacteriaceae\_unclassified* (OTU17) and *Streptococcus* (OTU28) were consistently  
79 associated with less optimal neurobehavioral outcomes. The other six OTUs were also associated  
80 with infant neurobehavioral responses depending on days at NICU stay.

81 **Conclusions:** This study explored the dynamic impact of specific OTUs on neurobehavioral  
82 development among preterm infants after controlling for early life experiences, i.e., acute and  
83 chronic pain/stress, and feeding in the NICU.

84  
85 **Keywords:** infants; preterm; NICU; neurobehavioral development; gut microbiota; pain; stress;  
86 feeding

### 87 **1. Introduction**

88 The mortality rate of preterm infants has significantly decreased recent years along with  
89 the advances of neonatal healthcare and medical treatments (Swamy et al., 2008; Glass et al.,  
90 2015; Bell et al., 2022), whereas preterm infants are still at high risk of neurodevelopmental  
91 deficiency in early life as well as late childhood mortality, and late onset mental and behavioral  
92 disorders (Vohr, 2013; Patel, 2016; Zhao et al., 2022). How to prevent the neurodevelopmental

93 deficiencies in these infants has been put in the center of child healthcare (Srinivas Jois, 2018).  
94 Current interventional strategies in promoting neurodevelopment among preterm infants are still  
95 lacking and less than optimal due to the underlying mechanisms of neurobehavioral development  
96 understudied in these high-risk population, which hindered the timely prevention, treatment, and  
97 prediction of neurobehavioral deficiencies in the early life stages.

98 The etiologies of preterm infant neurodevelopment are complex and multifactorial. We  
99 recently found that cumulative pain/stress experiences in early life are significantly related to  
100 altered neurobehavioral responses in preterm infants (Zhao et al., 2022), but the mechanisms  
101 demand further investigation. The brain-gut-microbiome axis, in which intestinal microbiome is  
102 proposed to play a key role in the regulation of stress and early programming of neuro-immune  
103 system that has been found to influence all aspects of human behaviors (Aatsinki et al., 2019;  
104 Oliphant et al., 2021; Seki et al., 2021). Preclinical and clinical studies have shown the brain-gut-  
105 microbiome axis involved in the regulation of neurobehavioral and cognitive development  
106 (Oliphant et al., 2021; Olson et al., 2021). Studies have reported that the gut microbiota regulated  
107 the pathophysiologic process of brain injury and neurological developments among preterm  
108 infants (Stewart et al., 2013; Seki et al., 2021; Beghetti et al., 2022). Several gut bacteria species  
109 have been identified to be involved in behavior mitigation and cognitive adjustment (Sordillo et  
110 al., 2019; Rozé et al., 2020).

111 Identifying potential pathogens and the pathogenesis process of gut microbiota involved  
112 in neurobehavioral development among preterm infants will facilitate the early relief and  
113 treatment of neurobehavioral deficiencies. Many are still unknown regarding the impact of early  
114 life experiences combined with gut microbiota on neurobehavioral development among preterm  
115 infants and few studies used longitudinal cohort design. Therefore, our study aimed to explore  
116 the longitudinal impact of gut microbiota and daily painful/stress experiences on the  
117 neurobehavioral development among preterm infants during their NICU hospitalization.

## 118 **2. Methods**

### 119 **2.1 Design**

120 A longitudinal cohort study was conducted at two NICUs in the Northeastern U.S. from  
121 January 2014 to August 2017. Preterm infants were followed from admission into the NICUs  
122 until their 28<sup>th</sup> postnatal day or discharge from the NICUs. The study protocol was approved by  
123 the institutional review board of the study hospital and the affiliated institute. Written informed  
124 consent was obtained from parents of the preterm infants.

### 125 **2.2 Inclusion and exclusion criteria**

126 Preterm infants were included if they were: 1) 0 - 7 days old after birth; 2) born at 28 to  
127 32 weeks of gestational age (28 0/7 to 32 6/7); 3) negative drug exposure history (no illicit drug  
128 use during pregnancy). Exclusion criteria included: 1) infant mothers were younger than 18 years  
129 old; 2) severe periventricular/ intraventricular hemorrhage ( $\geq$  Grade III); 3) other known  
130 congenital anomalies.

### 131 **2.3 Measurements**

#### 132 **2.3.1 Demographic and clinical data collection**

133 Demographic and clinical characteristics including sex, gestational age (GA), delivery  
134 type, birth weight and length were recorded by research nurses. The severity of illness of the  
135 infant was measured using the Score for Neonatal Acute Physiology – Perinatal Extension-II  
136 (SNAPPE-II) (Richardson et al., 2001). Daily antibiotic use, feeding types (mother's breast milk,  
137 donor's milk, and formula milk) and frequencies, and painful/stress experiences during the NICU  
138 hospitalization were recorded by research nurses.

### 139 **2.3.2 Assessment of daily painful/stress experiences**

140 The Neonatal Infant Stressor Scale (NISS) was used to assess daily painful/stress  
141 experiences (47 acute and 23 chronic procedures or events) in early life, which was modified  
142 from the Australia version in our previous study based on the NICU practice in the U.S. (Zhao et  
143 al., 2022). The intensities of acute and chronic painful/stressful procedures were categorized into  
144 five domains (1= not painful/stressful; 2 = a little; 3 = moderate; 4 = very; and 5 = extremely  
145 painful/stressful). The detailed painful/stressful procedures and categories were list in  
146 Supplementary file 1. Trained research nurses extracted the NISS data from the infant electronic  
147 medical record and documented the data into the Research Electronic Data Capture (REDCap)  
148 system (Harris et al., 2019). Weighted frequencies (acute) and hours of procedures (chronic)  
149 were calculated by timing the counts and intensities of each procedure in each day of NICU stay  
150 to generate daily acute pain/stress scores and chronic pain/stress scores following our protocol  
151 (Zhao et al., 2022).

### 152 **2.3.3 Fecal sample and gut microbiota**

153 Daily fecal samples were collected during diaper change depending on whether an infant  
154 had stool. Samples were processed following our previous protocol (Cong et al., 2016). The fecal  
155 sample DNA extraction and processing followed our previous methods and procedures (Cong et  
156 al., 2016; Chen et al., 2021). The raw sequence data were processed by the Mothur 1.42.3  
157 pipeline (Schloss et al., 2009) following Mothur miseq process and the miseq bash  
158 (Supplementary file 2) (Chen et al., 2021). The operational taxonomic units (OTUs) were  
159 determined by clustering reads to the SILVA 119 16S reference dataset at a 97% identity, and  
160 then performing de novo OTU clustering on reads that failed to cluster to a reference (Edgar,  
161 2018). Taxonomic annotation was also determined by the SILVA 119 V4 16S rRNA reference  
162 database (Quast et al., 2013; Yilmaz et al., 2014).

### 163 **2.3.4 Neurobehavioral development assessment**

164 Neurobehavioral outcomes were assessed using the NICU Network Neurobehavioral  
165 Scale (NNS) (Lester et al., 2004) when an infant reached 36 to 38 weeks post-menstrual age  
166 (PMA) before the NICU discharge. The NNS includes 115 items resulting in 13 summary  
167 scores assessing habituation, attention, arousal, self-regulation, handling, quality of movement,  
168 excitability, lethargy, reflexes, asymmetrical responses, hypertonicity, hypotonicity, and  
169 stress/abstinence. One trained and certified NNS examiner who was blinded to all other  
170 assessments completed all the assessment and scoring of the NNS subscales.

## 171 **2.4 Data analysis**

172 The demographic and clinical data, and OTU tables were imported into R 3.6.2 for  
173 statistical analysis. The clinical variables including the painful/stressful procedures of different  
174 levels and the population daily feeding of mother's breast milk, donor's milk and formula milk  
175 were visualized by plotting the pattern over time using the "ggplot2" package in R (Wickham,  
176 2016). The sex differences regarding the demographic and clinical characteristics were tested by  
177 Wilcoxon rank sum test for continuous variable and Fisher's exact test for categorical variables.

178 To explore the predictive microbiome biomarkers and estimate time-varying dynamics of  
179 their impact during early postnatal stage on the neurobehavioral outcomes of the preterm infants,  
180 sparse log-contrast regression with functional compositional predictors (Sun et al., 2020) was  
181 adopted. Infants who had 5 or more fecal samples after raw sequencing data processed were  
182 included in the current analysis to explore the time-varying effects using the sparse log-contrast  
183 regression model. The core OTUs were screened by the abundance and prevalence criteria before  
184 fitting the statistical model. Demographics variables including sex and race, delivery type,

185 premature rupture of membranes (PROM) status and gestational age at birth were incorporated  
186 into the model as time-invariant control variables. The cubic spline basis was used for modeling  
187 the time-varying effects of the OTUs and a constrained group lasso (CGL) algorithm was used  
188 for compositional component selection at OTU level (Yuan and Lin, 2006; Sun et al., 2020). A  
189 hundred bootstrap samples were generated and used to provide supporting evidence for the  
190 stability of the results. The OTUs were chosen by the model selection process and those with  
191 higher proportions of being selected in the bootstrap procedure were kept.

### 192 **3. Results**

#### 193 **3.1 Demographic and clinical characteristics**

194 A total of 92 preterm infants were recruited, and 55 infants were included in this report  
195 based on the completion of the microbiome and NNNS measurements (Supplementary Figure 1).  
196 The majority infants were Non-Hispanic/Latino White (74.55%), female (54.55%), and born  
197 through c-section (61.82%) (Table 1). About 80% of the preterm infants received antibiotics  
198 during the first 3 days of the NICU stay; after day 3, only 20% of them used antibiotics. Feeding  
199 patterns included mother's breast milk breastfeeding (61.65%), human donor milk (26.31%) and  
200 formula milk (12.04%) during the NICU hospitalization. The proportion of mother's breast milk  
201 intake are shown in Supplementary Figure 2a, and sex-specific daily feeding patterns are shown  
202 in Supplementary Figure 3. For the daily average painful/stress experience (NISS scores),  
203 weighted frequencies of acute painful events (mean = 62.66, SD = 9.94) and weighted hours of  
204 chronic painful procedures (mean = 89.84, SD = 36.72) were calculated and plotted across sex  
205 (Supplementary Figure 2b, 2c).

#### 206 **3.2 The gut microbiota compositions**

207 A total of 584 stool samples were included in the analysis (Supplementary Table 1). The  
208 most abundant phylum was *Proteobacteria*, *Firmicutes*, and *Bacteroidetes*. The compositional  
209 relative abundances for the 55 preterm infants were plotted on the average basis (Figure 1).  
210 Detailed taxonomy of each OTU was summarized in Supplementary Table 2.

#### 211 **3.3 Neurobehavioral development**

212 The NNNS assessment scores were presented in Table 2 and Supplementary Figure 4.  
213 These preterm infants had high level of hypertonicity, hypotonicity, and asymmetric reflexes  
214 (median score = 0), followed by stress/abstinence and handling (Supplementary Figure 4). Given  
215 the substantial missing values on some of the subscales, the main focuses of the current analysis  
216 were on stress/abstinence (NSTRESS), handling (NHANDLING), and quality of move  
217 (NQMOVE). The stress/abstinence (NSTRESS), handling (NHANDLING), and quality of move  
218 (NQMOVE) among these preterm infants at 36 to 38 weeks of post-menstrual age was 0.18 (SD  
219 = 0.09), 0.56 (SD = 0.21), and 3.97 (SD = 0.62), respectively. There was no significant  
220 difference between females and males.

#### 221 **3.4 Associations of pain/stress experience and gut microbiota with neurobehaviors**

222 The estimated coefficients of the control variables for the NSTRESS, NQMOVE, and  
223 NHANDLING assessment were shown in Supplementary Table 3. As shown by the bootstrap  
224 analysis, infants with older birth GA, sex of male, race of white, virginal birth, no RPOM, lower  
225 acute pain, higher kangaroo care, and no antibiotic uses in the first 3 days of NICU stay might be  
226 associated with better outcomes including lower NSTRESS scores (Figure 2 a) and lower  
227 NHANDLING scores (Figure 3 a), and higher NQMOVE scores (Figure 4 a). In particular, the  
228 positive association of higher acute pain/stress (NISS score) with higher NSTRESS scores was  
229 seen in close to 95% of bootstrap (Figure 2 a), indicating that infants who experienced less acute  
230 painful/stressful events during the NICU stay had better neurobehavioral outcomes. However,



231 the relationships of feeding patterns and chronic pain (NISS score) with NNNS subscales were  
232 still undetermined.

233 To illustrate the relationships between gut microbiota compositions and NNNS subscales  
234 (NSTRESS, NHANDLING, and NQMOVE), the standardized scores of each these subscales  
235 were plotted with the gut microbiome for each infant using a heatmap (Figure 1). A standardized  
236 score of NNNS subscales was generated by dividing the difference between each infant's score  
237 and the mean by the standard deviation.

238 Eight OTUs were identified to be associated with NNNS subscales through the regression  
239 analysis (Figure 2, 3, and 4). At the taxonomy levels, five belong to *Firmicutes* (OTU4, OTU5,  
240 OTU6, OTU8, and OTU28), and three belong to *Proteobacteria* (OTU1, OTU2, and OTU17).  
241 The taxa of the OTU1 (*Enterobacteriaceae\_unclassified*), OTU2 (*Escherichia-Shigella*), and  
242 OTU17 (*Enterobacteriaceae\_unclassified*) were identical at the family level  
243 (*Enterobacteriaceae*), OTU1 (*Enterobacteriaceae\_unclassified*) and OTU17  
244 (*Enterobacteriaceae\_unclassified*) were also identical at genus level (Supplementary Table 2).  
245 The associations of these OTUs and NNNS subscales varied depending on different days of  
246 NICU stay (Figure 2, 3, and 4) after controlling for feeding types and pain/stress experiences in  
247 addition to demographic and clinical characteristics.

248 The OTU1 (*Enterobacteriaceae\_unclassified*), OTU2 (*Escherichia-Shigella*), OTU5  
249 (*Veillonella*), OTU4 (*Incertae\_Sedis*), OTU8 (*Clostridium\_sensu\_stricto\_1*), and OTU17  
250 (*Enterobacteriaceae\_unclassified*) were identified to be associated with NSTRESS, and their  
251 estimated time-varying effects are presented in each sub figures of Figure 2. The effect of the  
252 OTU2 (*Escherichia-Shigella*), OTU4 (*Incertae\_Sedis*), and OTU8 (*Clostridium\_sensu\_stricto\_1*)  
253 on the NSTRESS score switches from positive to negative during the postnatal days from 4 to 28,  
254 while the effect of the OTU1 (*Enterobacteriaceae\_unclassified*) and OTU5 (*Veillonella*)  
255 switches from negative to positive. The OTU17 (*Enterobacteriaceae\_unclassified*) shows  
256 consistently positive effect on NSTRESS score during the 28 days of NICU stay. Elevated  
257 abundance of *Enterobacteriaceae* (OTU1 and OTU17) was significantly associated with  
258 increased NSTRESS, particularly after two weeks of NICU stay (Figure 2). But the elevated  
259 enrichment of *Escherichia-Shigella* (OTU2) was associated with decreased NSTRESS,  
260 particularly after 10 days.

261 The OTU1 (*Enterobacteriaceae\_unclassified*), OTU2 (*Escherichia-Shigella*), OTU 5  
262 (*Veillonella*), OTU 6 (*Enterococcus*), OTU8 (*Clostridium\_sensu\_stricto\_1*), and OTU28  
263 (*Streptococcus*) were selected for the model regressing on NHANDLING. Their estimated time-  
264 varying effects are presented in each sub figures of Figure 3. The effect of the OTU1  
265 (*Enterobacteriaceae\_unclassified*), OTU2 (*Escherichia-Shigella*), OTU5 (*Veillonella*), and  
266 OTU6 (*Enterococcus*) on the NHANDLING score remains positive during the first month, while  
267 the effect of the OTU8 (*Clostridium\_sensu\_stricto\_1*) was constantly negative. The OTU28  
268 (*Streptococcus*) shows enlarging negative effect on the NHANDLING score over the first month.

269 The OTU4 (*Incertae\_Sedis*) was the only OTU selected for NQMOVE; their estimated  
270 time-varying effects are presented in Figure 4. The effect of the OTU4 (*Incertae\_Sedis*) on the  
271 NQMOVE score became negative after day 10.

#### 272 **4. Discussion**

273 Our study using a longitudinal modeling approach demonstrated the impact of early life  
274 pain/stress experience and gut microbiota on neurobehavioral outcomes in preterm infants during  
275 their NICU hospitalization. Consistent with previous studies, our findings showed that preterm  
276 infants had a higher risk of neurobehavioral deficiency compared with full term infants (Kiblawi

277 et al., 2014; Provenzi et al., 2018; McGowan et al., 2022). In comparison to the neurobehavioral  
278 results from healthy full-term infants at birth (Provenzi et al., 2018), our findings showed that  
279 preterm infants had higher NNNS scores than full term infants in stress/abstinence (0.18 vs. 0.11)  
280 and handling responses (0.56 vs. 0.38), and lower quality of movement (3.97 vs. 4.71). The  
281 negative impact of higher acute painful/stressful events during the NICU stay on worse  
282 neurobehavioral outcomes is congruent with previous studies (Swamy et al., 2008; Lavanga et al.,  
283 2021; Russell et al., 2021). We identified eight OTUs of gut microbiome that were significantly  
284 associated with infant neurobehavioral profiles in early life. Most importantly, our study  
285 uncovered potential pathogenesis process of *Enterobacteriaceae* and *Streptococcaceae* involved  
286 in neurobehavioral outcomes by depicting the dynamical impacts of OTUs on NNNS scores.  
287 These findings are consistent with previous studies, which showed the brain-gut-microbiome  
288 axis involved in neonatal brain damage and immunity (Currie et al., 2011; Seki et al., 2021), and  
289 influencing the lifelong health of humans (Lyte, 2014; Cong et al., 2015).

290 The role of *Enterobacteriaceae* on NSTRESS is still unclear given that elevated  
291 abundance of *Enterobacteriaceae unclassified* (OTU1 and OTU17) was significantly associated  
292 with increased NSTRESS, but the elevated enrichment of *Escherichia-Shigella* (OTU2) was  
293 associated with decreased NSTRESS (Figure 2). Enriched *Enterobacteriaceae* has been  
294 demonstrated to induce inflammatory and stress response (Kim et al., 2017). Some studies  
295 reported the harmful effect of *Enterobacteriaceae* on cognitive function (Wasser et al., 2020;  
296 Streit et al., 2021), but the role of *Escherichia-Shigella* is unclear. Of note, only 55% percent of  
297 OTU2 was *Escherichia-Shigella*, the other 45% is unknown (Supplementary Table 4). Our study  
298 also found negative association between enriched abundance of *Incertae\_Sedis* (OTU4) and  
299 *Veillonella* (OTU5) and lower abstinence/stress level (NSTRESS) after 14 days, which may  
300 indicate the neuro-protective effect of *Incertae\_Sedis* and *Veillonella*. These potential protective  
301 effects were supported by previous studies which reported the role that *Incertae\_Sedis* plays in  
302 allergic disease (Quast et al., 2013), and *Veillonella* played in energy conservation among infants  
303 (Wang et al., 2020). The role of *Incertae\_Sedis* and *Veillonella* in the first two weeks of NICU  
304 hospitalization need more investigations.

305 Our study found that enrichment of *Enterococcus* (OTU6), genus level of  
306 *Enterococcaceae*, was associated with better handling response (Figure 3). The protective role of  
307 *Enterococcaceae* in the gut among cancer patients receiving radiotherapy was reported in a  
308 previous study that it is involved in maintaining hematopoiesis and intestinal barriers (Guo et al.,  
309 2020). The elevated abundance of *Enterococcaceae* has been reported to exert in the  
310 pathophysiology progress of several disorders such as infection and cytokines response (Hu et al.,  
311 2019; Rabe et al., 2020). The negative effect of *Clostridium\_sensu\_stricto\_1*(OTU8) on  
312 NHANDLING was also confirmed in our study, since it was associated with higher risk of  
313 necrotizing enterocolitis and prematurity (Schönherr-Hellec et al., 2018).

314 Enriched *Streptococcus* (OTU28) was related to a lower score of NHANDLING  
315 indicating a better developmental outcome, and the negative impact accumulated over time in  
316 NICU. Aatsinki et al reported the positive association between behavioral development and  
317 *Streptococcus* in infants at the age of 6 months (Aatsinki et al., 2019), but the role of enriched  
318 *Streptococcus* in preterm infants is still unknown. Elevated *Streptococcus* (OTU28) was found in  
319 the gut microbiota among children in atopic dermatitis, an allergic reaction (Park et al., 2020). A  
320 previous study also reported the role of *Streptococcus* (OTU28) in infections, i.e., sepsis and  
321 meningitis among preterm infants (Geetha et al., 2021) and *Streptococcus pneumoniae* in infants

322 (Turner et al., 2012; Nieto-Moro et al., 2020), a possible reason might be related to the immature  
323 immune responses (Currie et al., 2011).

324 Even the negative effect of *Clostridium\_sensu\_stricto* (OTU8) and *Streptococcus*  
325 (OTU28) on handling response was identified (Figure 3), our study did not find significantly  
326 direct association between breastfeeding and neurobehavioral development. Higher portion of  
327 breastfeeding could alter gut microbiota compositions (Pannaraj et al., 2017), as well as was  
328 associated with better neurobehavioral outcomes (Zhao et al., 2022). However, previous studies  
329 reported inconsistent findings regarding the effect of breastfeeding on *Clostridium\_sensu\_stricto*  
330 and *Streptococcus*. One study reported that higher proportion of breastfeeding and human donor  
331 milk could significantly increase the enrichment of *Clostridium\_sensu\_stricto* among preterm  
332 infants (Aguilar-Lopez et al., 2021). Another study also reported the protection role of  
333 breastfeeding on decreasing the risk of *Streptococcus* induced infection (Béghin et al., 2021).  
334 Further studies are needed to uncover the entangling between breastfeeding, gut microbiota, and  
335 neurobehavior development among preterm infants.

336 The sex and race differences of neurobehavioral development in preterm infants warrant  
337 more effort to investigate the possible underneath mechanisms, even there was no significant  
338 findings from the current study. Evidence has confirmed that there exists an impact of sex-  
339 dependent gut microbiota on the behavioral development of full-term infants (Jiang et al., 2019;  
340 Chen et al., 2021; Laue et al., 2022). The gut microbiota compositions and predicted functions  
341 differences between females and males could be a possible reason (Cong et al., 2016; Chen et al.,  
342 2021, 2022). Previous studies also reported the race differences of gut microbiota diversities  
343 (Pannaraj et al., 2017; Stearns et al., 2017), and compositions (Stearns et al., 2017; Cheng et al.,  
344 2022). Future studies should continue to investigate the mechanisms of sex and race disparities  
345 of neurobehavioral outcomes among preterm infants.

346 Our findings provided new evidence to demonstrate the gradually mature brain-gut-  
347 microbiome axis contributing to the neurobehavioral development among preterm infants.  
348 Manipulating the identified gut microbiota by interventional strategies such as fecal microbiome  
349 transplantation and/or supplementing prebiotics and probiotics may effectively improve the  
350 measured neurobehavioral outcomes among preterm infants, i.e., stress, handling responses and  
351 quality of movement (Cryan and Dinan, 2012; Sarkar et al., 2018; Vogel et al., 2020; Samara et  
352 al., 2022). The OTUs associated with neurobehavioral development among preterm infants  
353 identified in the current study were generated using the 16S RNA sequencing data that may have  
354 limitations in conducting data analysis and making inferences based on OTUs, i.e., less powerful  
355 to detect differential effects and functions of gut microbiota. Further studies may also need to  
356 employ shotgun sequencing and brain image techniques to yield more information including the  
357 metabolic functions of the gut microbiome community and the activities of the brain-gut-  
358 microbiome axis to explore how the gut microbiome and host brain-gut axis function in the  
359 growth and development among preterm infants.

## 360 **5. Strengths and Limitations**

361 To the best of our knowledge, this is one of the first longitudinal studies modeling the  
362 impact of early life pain/stress experience and gut microbiota on neurobehavioral outcomes  
363 among preterm infants throughout the NICU hospitalization. The neurobehavioral development  
364 measured by NNNS in this study may serve as valid indicators to predict neurodevelopmental  
365 and infant health outcomes in the clinical settings, although it may not directly predict infant  
366 mortality or morbidity. One of the limitations of our study was that this study only included  
367 preterm infants born at 28 to 32 weeks of gestational age which did not consider the extremely



368 preterm infants who are more likely to have developmental deficits. Another limitation was the  
 369 weakness of the 16S sequencing data and analysis pipeline based on OTUs. Therefore, the  
 370 generalization of findings from this study should be cautious and applying evidence generated in  
 371 this study should be prudent.

## 372 6. Conclusions

373 This longitudinal cohort study reported the dynamic impact of gut microbiota and adverse  
 374 life experiences in the NICU on neurobehavioral development among preterm infants. In  
 375 addition, specific OTUs combined with acute painful/stressful experiences were determined to  
 376 influence infants' neurobehavioral development during their NICU hospitalization. Further  
 377 studies may need to develop interventions targeting these factors to prompt developmental  
 378 outcomes in this population.

379 Table 1. Characteristics of the included infants, Mean (SD)

|                                      | Total (n = 55)   | Female (n=30)    | Male (n=25)      |
|--------------------------------------|------------------|------------------|------------------|
| Birth gestational age (week)         | 30.72 (1.71)     | 30.53 (1.72)     | 30.96 (1.71)     |
| Birth body length (cm)               | 39.94 (3.25)     | 39.56 (3.34)     | 40.38 (3.17)     |
| Birth body weight (g)                | 1444.53 (406.61) | 1362.87 (413.29) | 1542.52 (383.76) |
| Birth head circumference (cm)        | 27.86 (1.88)     | 27.50 (2.05)     | 28.31 (1.59)     |
| SNAPE II [media, IQR] <sup>a</sup>   | 9.31 (9.66)      | 11.07 (10.57)    | 7.2 (8.15)       |
| C-cession (n, %)                     | 34 (61.82%)      | 21 (70.00%)      | 13 (52.00%)      |
| Pre-rupture of membrane (n, %)       | 22 (40%)         | 11 (36.67%)      | 11 (44%)         |
| Race (n, %)                          |                  |                  |                  |
| White                                | 41 (74.54%)      | 23 (76.67%)      | 18 (72.00%)      |
| American African                     | 11 (20.00%)      | 4 (13.33%)       | 7 (28.00%)       |
| Asian                                | 2 (3.64%)        | 2 (6.67%)        | 0 (0.00%)        |
| Unknown                              | 1 (1.82%)        | 1 (3.33%)        | 0 (0.00%)        |
| Averaged MBM percentage <sup>b</sup> | 61.46% (32.07)   | 63.09% (33.02)   | 59.51% (31.46)   |
| Averaged Acute pain <sup>c</sup>     | 62.66 (9.94)     | 62.01 (9.65)     | 63.43 (10.42)    |
| Averaged Chronic pain <sup>c</sup>   | 89.84 (36.72)    | 93.44 (37.76)    | 85.82 (35.68)    |

381 <sup>a</sup> SNAPE II, Score for Neonatal Acute Physiology – Perinatal Extension-II (SNAPPE-II)

382 <sup>b</sup> MBM, Mother's Breast Milk

383 <sup>c</sup> Weighted frequencies (acute) and hours of procedures (chronic) were calculated by timing the  
 384 counts and intensities of each procedure in each day of NICU stay to generate daily acute  
 385 pain/stress scores and chronic pain/stress scores.

386 Table 2 Neurobehavioral outcomes of the included infants, Mean (SD)

| NNNS <sup>a</sup>            | Total (n = 55) | Female (n=30) | Male (n=25) |
|------------------------------|----------------|---------------|-------------|
| Stress/abstinence (NSTRESS)  | 0.18 (0.09)    | 0.19 (0.09)   | 0.17 (0.09) |
| Handling (NHANDLING)         | 0.56 (0.21)    | 0.57 (0.21)   | 0.56 (0.22) |
| Quality of movement (NQMOVE) | 3.97 (0.62)    | 3.90 (0.65)   | 4.05 (0.60) |

388 <sup>a</sup> NNNS, NICU Network Neurobehavioral Scale

389  
 390 **Data Availability Statement**

391 The raw sequence data were achieved in NCBI  
392 (<https://submit.ncbi.nlm.nih.gov/subs/sra/SUB8904718/>). Deidentified data will be available  
393 upon reasonable request. Requests to access these datasets should be directed to  
394 xiaomei.cong@yale.edu.

### 395 **Ethics Statement**

396 The studies involving human participants were reviewed and approved by institutional review  
397 board in the University of Connecticut and Connecticut Children's Medical Center. The  
398 deidentified dataset was used in the analysis. Written informed consent to participate in this  
399 study was provided by the participants' legal guardian/next of kin.

### 400 **Author Contributions**

401 Conceptualization, J.C., X.C., T. Z., and K.C.; formal analysis, J.C., H.L., T.Z., Z.S., W.X., K.C.,  
402 M.H.C., and X.C.; funding acquisition, X.C.; methodology, J.C., H.L., W.X., and X.C.; project  
403 administration, W.X., and X.C.; writing-original draft, J.C., H.L., T.Z., and X.C.; writing- review  
404 and editing, All. All authors critically revised the manuscript, gave final approval, and agree to  
405 be accountable for all aspects of work ensuring integrity and accuracy.

### 406 **Conflict of Interests**

407 The authors declare that the research was conducted in the absence of any commercial or  
408 financial relationships that could be construed as a potential conflict of interest.

### 409 **Acknowledgments**

410 The authors would like to acknowledge all the infants and their parents' participants in this study.  
411 The authors thank the medical and nursing staff in the NICUs of Connecticut Children's Medical  
412 Center at Hartford and Farmington, CT for their support and assistance. The authors thank  
413 Victoria Vazquez, Shari Galvin, and Megan Fitzsimons for their assistance in recruiting subjects,  
414 collecting clinical data, and managing stool sample collection and storage. The authors would  
415 also like to acknowledge the support from the Bio-Behavioral Lab (BBL) in the University of  
416 Connecticut School of Nursing. The authors acknowledge the Microbial Analysis, Resources,  
417 and Services (MARS) facility at the University of Connecticut for their ongoing support of this  
418 project.

### 419 **Funding Resource**

420 This publication was supported by the National Institute of Nursing Research of the National  
421 Institutes of Health (NIH-NINR) under Award Number K23NR014674 and R01NR016928, and  
422 Affinity Research Collaboratives award through the University of Connecticut Institute for  
423 Systems Genomics. Jie Chen received research support from Virginia Stone Fund through  
424 American Nurses Foundation Research Grants Award, Eastern Nursing Research Society  
425 (ENRS)/Council for the Advancement of Nursing Science Dissertation Award, Sigma Theta Tau  
426 International Mu Chapter Research Award, and the University of Connecticut Dissertation  
427 Fellowship.

### 428 **References**

- 429 Aatsinki, A.-K., Lahti, L., Uusitupa, H.-M., Munukka, E., Keskitalo, A., Nolvi, S., et al. (2019).  
430 Gut microbiota composition is associated with temperament traits in infants. *Brain. Behav.*  
431 *Immun.* 80, 849–858. doi:10.1016/j.bbi.2019.05.035.  
432 Aguilar-Lopez, M., Wetzel, C., MacDonald, A., Ho, T. T. B., and Donovan, S. M. (2021).  
433 Human Milk-Based or Bovine Milk-Based Fortifiers Differentially Impact the Development  
434 of the Gut Microbiota of Preterm Infants. *Front. Pediatr.* 9, 719096.  
435 doi:10.3389/fped.2021.719096.  
436 Beghetti, I., Barone, M., Turrone, S., Biagi, E., Sansavini, A., Brigidi, P., et al. (2022). Early-life

- 437 gut microbiota and neurodevelopment in preterm infants: any role for Bifidobacterium? *Eur.*  
438 *J. Pediatr.* 181, 1773–1777. doi:10.1007/s00431-021-04327-1.
- 439 Béghin, L., Tims, S., Roelofs, M., Rougé, C., Oozeer, R., Rakza, T., et al. (2021). Fermented  
440 infant formula (with Bifidobacterium breve C50 and Streptococcus thermophilus O65) with  
441 prebiotic oligosaccharides is safe and modulates the gut microbiota towards a microbiota  
442 closer to that of breastfed infants. *Clin. Nutr.* 40, 778–787. doi:10.1016/j.clnu.2020.07.024.
- 443 Bell, E. F., Hintz, S. R., Hansen, N. I., Bann, C. M., Wyckoff, M. H., DeMauro, S. B., et al.  
444 (2022). Mortality, In-Hospital Morbidity, Care Practices, and 2-Year Outcomes for  
445 Extremely Preterm Infants in the US, 2013-2018. *JAMA* 327, 248–263.  
446 doi:10.1001/jama.2021.23580.
- 447 Chen, J., Li, H., Hird, S. M., Chen, M.-H., Xu, W., Maas, K., et al. (2021). Sex Differences in  
448 Gut Microbial Development of Preterm Infant Twins in Early Life: A Longitudinal Analysis.  
449 *Front. Cell. Infect. Microbiol.* 11, 671074. doi:10.3389/fcimb.2021.671074.
- 450 Chen, J., Li, H., Maas, K., Starkweather, A., Chen, M., and Cong, X. (2022). Sex-specific gut  
451 microbiome profiles among preterm infants during the neonatal intensive care  
452 hospitalization. *Interdiscip. Nurs. Res.* 1, 6–13. doi:10.1097/NR9.0000000000000004.
- 453 Cheng, Y., Selma-Royo, M., Cao, X., Calatayud, M., Qi, Q., Zhou, J., et al. (2022). Influence of  
454 Geographical Location on Maternal-Infant Microbiota: Study in Two Populations From  
455 Asia and Europe. *Front. Cell. Infect. Microbiol.* 11, 663513.  
456 doi:10.3389/fcimb.2021.663513.
- 457 Cong, X., Henderson, W. A., Graf, J., and McGrath, J. M. (2015). Early Life Experience and Gut  
458 Microbiome. *Adv. Neonatal Care* 15, 314–323. doi:10.1097/ANC.0000000000000191.
- 459 Cong, X., Xu, W., Janton, S., Henderson, W. A., Matson, A., McGrath, J. M., et al. (2016). Gut  
460 Microbiome Developmental Patterns in Early Life of Preterm Infants: Impacts of Feeding  
461 and Gender. *PLoS One* 11, e0152751. doi:10.1371/journal.pone.0152751.
- 462 Cryan, J. F., and Dinan, T. G. (2012). Mind-altering microorganisms: the impact of the gut  
463 microbiota on brain and behaviour. *Nat. Rev. Neurosci.* 13, 701–712. doi:10.1038/nrn3346.
- 464 Currie, A. J., Curtis, S., Strunk, T., Riley, K., Liyanage, K., Prescott, S., et al. (2011). Preterm  
465 Infants Have Deficient Monocyte and Lymphocyte Cytokine Responses to Group B  
466 Streptococcus. *Infect. Immun.* 79, 1588–1596. doi:10.1128/IAI.00535-10.
- 467 Edgar, R. C. (2018). Updating the 97% identity threshold for 16S ribosomal RNA OTUs.  
468 *Bioinformatics* 34, 2371–2375. doi:10.1093/bioinformatics/bty113.
- 469 Geetha, O., Cherie, C., Natalie, T. W. H., Merchant, K., Chien, C. M., and Chandran, S. (2021).  
470 Streptococcus gallolyticus subspecies pasteurianus causing early onset neonatal sepsis  
471 complicated by solitary liver abscess in a preterm infant. *Access Microbiol.* 3, 000200.  
472 doi:10.1099/acmi.0.000200.
- 473 Glass, H. C., Costarino, A. T., Stayer, S. A., Brett, C. M., Cladis, F., and Davis, P. J. (2015).  
474 Outcomes for extremely premature infants. *Anesth. Analg.* 120, 1337–51.  
475 doi:10.1213/ANE.0000000000000705.
- 476 Guo, H., Chou, W.-C., Lai, Y., Liang, K., Tam, J. W., Brickey, W. J., et al. (2020). Multi-omics  
477 analyses of radiation survivors identify radioprotective microbes and metabolites. *Science*  
478 (80- ). 370, eaay9097. doi:10.1126/science.aay9097.
- 479 Harris, P. A., Taylor, R., Minor, B. L., Elliott, V., Fernandez, M., O’Neal, L., et al. (2019). The  
480 REDCap consortium: Building an international community of software platform partners. *J.*  
481 *Biomed. Inform.* 95, 103208. doi:10.1016/j.jbi.2019.103208.
- 482 Hu, Y., Yang, Q., Liu, B., Dong, J., Sun, L., Zhu, Y., et al. (2019). Gut microbiota associated

- 483 with pulmonary tuberculosis and dysbiosis caused by anti-tuberculosis drugs. *J. Infect.* 78,  
484 317–322. doi:10.1016/j.jinf.2018.08.006.
- 485 Jiang, H. yin, Xu, L. lian, Zhang, X., Zhang, Z., and Ruan, B. (2019). The microbiome in bipolar  
486 depression: A longitudinal study of one pair of monozygotic twins. *Bipolar Disord.* 21, 93–  
487 97. doi:10.1111/bdi.12736.
- 488 Kiblawi, Z. N., Smith, L. M., Diaz, S. D., LaGasse, L. L., Derauf, C., Newman, E., et al. (2014).  
489 Prenatal methamphetamine exposure and neonatal and infant neurobehavioral outcome:  
490 results from the IDEAL study. *Subst. Abus.* 35, 68–73. doi:10.1080/08897077.2013.814614.
- 491 Kim, Y.-G., Sakamoto, K., Seo, S.-U., Pickard, J. M., Gilliland, M. G., Pudlo, N. A., et al.  
492 (2017). Neonatal acquisition of Clostridia species protects against colonization by bacterial  
493 pathogens. *Science* 356, 315–319. doi:10.1126/science.aag2029.
- 494 Laue, H. E., Karagas, M. R., Coker, M. O., Bellinger, D. C., Baker, E. R., Korrick, S. A., et al.  
495 (2022). Sex-specific relationships of the infant microbiome and early-childhood behavioral  
496 outcomes. *Pediatr. Res.* 92, 580–591. doi:10.1038/s41390-021-01785-z.
- 497 Lavanga, M., Bollen, B., Caicedo, A., Dereymaeker, A., Jansen, K., Ortibus, E., et al. (2021).  
498 The effect of early procedural pain in preterm infants on the maturation of  
499 electroencephalogram and heart rate variability. *Pain* 162, 1556–1566.  
500 doi:10.1097/j.pain.0000000000002125.
- 501 Lester, B. M., Tronick, E. Z., and Brazelton, T. B. (2004). The Neonatal Intensive Care Unit  
502 Network Neurobehavioral Scale procedures. *Pediatrics* 113, 641–67.
- 503 Lyte, M. (2014). Microbial endocrinology and the microbiota-gut-brain axis. *Adv. Exp. Med.*  
504 *Biol.* 817, 3–24. doi:10.1007/978-1-4939-0897-4\_1.
- 505 McGowan, E. C., Hofheimer, J. A., O’Shea, T. M., Kilbride, H., Carter, B. S., Check, J., et al.  
506 (2022). Analysis of Neonatal Neurobehavior and Developmental Outcomes Among Preterm  
507 Infants. *JAMA Netw. open* 5, e2222249. doi:10.1001/jamanetworkopen.2022.22249.
- 508 Nieto-Moro, M., Ecclesia, F. G., Tomé-Masa, I., De Lama Caro-Patón, G., Leoz-Gordillo, I.,  
509 Cabrero-Hernández, M., et al. (2020). SARS-CoV-2 and Streptococcus pneumoniae  
510 coinfection as a cause of severe pneumonia in an infant. *Pediatr. Pulmonol.* 55, 2198–2200.  
511 doi:10.1002/ppul.24916.
- 512 Oliphant, K., Ali, M., D’Souza, M., Hughes, P. D., Sulakhe, D., Wang, A. Z., et al. (2021).  
513 Bacteroidota and Lachnospiraceae integration into the gut microbiome at key time points in  
514 early life are linked to infant neurodevelopment. *Gut Microbes* 13, 1997560.  
515 doi:10.1080/19490976.2021.1997560.
- 516 Olson, C. A., Iñiguez, A. J., Yang, G. E., Fang, P., Pronovost, G. N., Jameson, K. G., et al.  
517 (2021). Alterations in the gut microbiota contribute to cognitive impairment induced by the  
518 ketogenic diet and hypoxia. *Cell Host Microbe* 29, 1378-1392.e6.  
519 doi:10.1016/j.chom.2021.07.004.
- 520 Pannaraj, P. S., Li, F., Cerini, C., Bender, J. M., Yang, S., Rollie, A., et al. (2017). Association  
521 Between Breast Milk Bacterial Communities and Establishment and Development of the  
522 Infant Gut Microbiome. *JAMA Pediatr.* 171, 647. doi:10.1001/jamapediatrics.2017.0378.
- 523 Park, Y. M., Lee, S.-Y., Kang, M.-J., Kim, B.-S., Lee, M.-J., Jung, S. S., et al. (2020). Imbalance  
524 of Gut Streptococcus, Clostridium, and Akkermansia Determines the Natural Course of  
525 Atopic Dermatitis in Infant. *Allergy. Asthma Immunol. Res.* 12, 322.  
526 doi:10.4168/aair.2020.12.2.322.
- 527 Patel, R. M. (2016). Short- and Long-Term Outcomes for Extremely Preterm Infants. *Am. J.*  
528 *Perinatol.* 33, 318–28. doi:10.1055/s-0035-1571202.



- 529 Provenzi, L., Olson, K., Giusti, L., Montiroso, R., DeSantis, A., and Tronick, E. (2018). NICU  
530 Network Neurobehavioral Scale: 1-month normative data and variation from birth to 1  
531 month. *Pediatr. Res.* 83, 1104–1109. doi:10.1038/pr.2018.25.
- 532 Quast, C., Pruesse, E., Yilmaz, P., Gerken, J., Schweer, T., Yarza, P., et al. (2013). The SILVA  
533 ribosomal RNA gene database project: improved data processing and web-based tools.  
534 *Nucleic Acids Res.* 41, D590-6. doi:10.1093/nar/gks1219.
- 535 Rabe, H., Lundell, A. C., Sjöberg, F., Ljung, A., Strömbeck, A., Gio-Batta, M., et al. (2020).  
536 Neonatal gut colonization by Bifidobacterium is associated with higher childhood cytokine  
537 responses. *Gut Microbes* 12, 1–14. doi:10.1080/19490976.2020.1847628.
- 538 Richardson, D. K., Corcoran, J. D., Escobar, G. J., and Lee, S. K. (2001). SNAP-II and  
539 SNAPPE-II: Simplified newborn illness severity and mortality risk scores. *J. Pediatr.* 138,  
540 92–100. doi:10.1067/mpd.2001.109608.
- 541 Rozé, J. C., Ancel, P. Y., Marchand-Martin, L., Rousseau, C., Montassier, E., Monot, C., et al.  
542 (2020). Assessment of Neonatal Intensive Care Unit Practices and Preterm Newborn Gut  
543 Microbiota and 2-Year Neurodevelopmental Outcomes. *JAMA Netw. open* 3, e2018119.  
544 doi:10.1001/jamanetworkopen.2020.18119.
- 545 Russell, J. T., Lauren Ruoss, J., de la Cruz, D., Li, N., Bazacliu, C., Patton, L., et al. (2021).  
546 Antibiotics and the developing intestinal microbiome, metabolome and inflammatory  
547 environment in a randomized trial of preterm infants. *Sci. Rep.* 11, 1943.  
548 doi:10.1038/s41598-021-80982-6.
- 549 Samara, J., Moossavi, S., Alshaikh, B., Ortega, V. A., Pettersen, V. K., Ferdous, T., et al. (2022).  
550 Supplementation with a probiotic mixture accelerates gut microbiome maturation and  
551 reduces intestinal inflammation in extremely preterm infants. *Cell Host Microbe* 30, 696-  
552 711.e5. doi:10.1016/j.chom.2022.04.005.
- 553 Sarkar, A., Harty, S., Lehto, S. M., Moeller, A. H., Dinan, T. G., Dunbar, R. I. M., et al. (2018).  
554 The Microbiome in Psychology and Cognitive Neuroscience. *Trends Cogn. Sci.* 22, 611–  
555 636. doi:10.1016/j.tics.2018.04.006.
- 556 Schloss, P. D., Westcott, S. L., Ryabin, T., Hall, J. R., Hartmann, M., Hollister, E. B., et al.  
557 (2009). Introducing mothur: Open-source, platform-independent, community-supported  
558 software for describing and comparing microbial communities. *Appl. Environ. Microbiol.*  
559 75, 7537–7541. doi:10.1128/AEM.01541-09.
- 560 Schönherr-Hellec, S., Klein, G. L., Delannoy, J., Ferraris, L., Rozé, J. C., Butel, M. J., et al.  
561 (2018). Clostridial Strain-Specific Characteristics Associated with Necrotizing Enterocolitis.  
562 *Appl. Environ. Microbiol.* 84, e02428-17. doi:10.1128/AEM.02428-17.
- 563 Seki, D., Mayer, M., Hausmann, B., Pjevac, P., Giordano, V., Goeral, K., et al. (2021). Aberrant  
564 gut-microbiota-immune-brain axis development in premature neonates with brain damage.  
565 *Cell Host Microbe* 29, 1558-1572.e6. doi:10.1016/j.chom.2021.08.004.
- 566 Sordillo, J. E., Korricks, S., Laranjo, N., Carey, V., Weinstock, G. M., Gold, D. R., et al. (2019).  
567 Association of the Infant Gut Microbiome With Early Childhood Neurodevelopmental  
568 Outcomes: An Ancillary Study to the VDAART Randomized Clinical Trial. *JAMA Netw.*  
569 *open* 2, e190905. doi:10.1001/jamanetworkopen.2019.0905.
- 570 Srinivas Jois, R. (2018). Neurodevelopmental outcome of late-preterm infants: A pragmatic  
571 review. *Aust. J. Gen. Pract.* 47, 776–781. doi:10.31128/AJGP-03-18-4539.
- 572 Stearns, J. C., Zulyniak, M. A., de Souza, R. J., Campbell, N. C., Fontes, M., Shaikh, M., et al.  
573 (2017). Ethnic and diet-related differences in the healthy infant microbiome. *Genome Med.*  
574 9, 32. doi:10.1186/s13073-017-0421-5.

- 575 Stewart, C. J., Marrs, E. C. L., Nelson, A., Lanyon, C., Perry, J. D., Embleton, N. D., et al.  
576 (2013). Development of the preterm gut microbiome in twins at risk of necrotising  
577 enterocolitis and sepsis. *PLoS One* 8, e73465. doi:10.1371/journal.pone.0073465.
- 578 Streit, F., Prandovszky, E., Send, T., Zillich, L., Frank, J., Sabunciyan, S., et al. (2021).  
579 Microbiome profiles are associated with cognitive functioning in 45-month-old children.  
580 *Brain. Behav. Immun.* 98, 151–160. doi:10.1016/j.bbi.2021.08.001.
- 581 Sun, Z., Xu, W., Cong, X., Li, G., and Chen, K. (2020). LOG-CONTRAST REGRESSION  
582 WITH FUNCTIONAL COMPOSITIONAL PREDICTORS: LINKING PRETERM  
583 INFANT’S GUT MICROBIOME TRAJECTORIES TO NEUROBEHAVIORAL  
584 OUTCOME. *Ann. Appl. Stat.* 14, 1535–1556. doi:10.1214/20-aoas1357.
- 585 Swamy, G. K., Ostbye, T., and Skjaerven, R. (2008). Association of preterm birth with long-term  
586 survival, reproduction, and next-generation preterm birth. *JAMA* 299, 1429–36.  
587 doi:10.1001/jama.299.12.1429.
- 588 Turner, P., Melchiorre, S., Moschioni, M., Barocchi, M. A., Turner, C., Watthanaworawit, W., et  
589 al. (2012). Assessment of *Streptococcus pneumoniae* pilus islet-1 prevalence in carried and  
590 transmitted isolates from mother–infant pairs on the Thailand–Burma border. *Clin.*  
591 *Microbiol. Infect.* 18, 970–975. doi:10.1111/j.1469-0691.2011.03711.x.
- 592 Vogel, S. C., Brito, N. H., and Callaghan, B. L. (2020). Early Life Stress and the Development of  
593 the Infant Gut Microbiota: Implications for Mental Health and Neurocognitive  
594 Development. *Curr. Psychiatry Rep.* 22, 61. doi:10.1007/s11920-020-01186-9.
- 595 Vohr, B. (2013). Long-term outcomes of moderately preterm, late preterm, and early term infants.  
596 *Clin. Perinatol.* 40, 739–51. doi:10.1016/j.clp.2013.07.006.
- 597 Wang, L., de Ángel Solá, D., Acevedo Flores, M., Schriefer, A., Wang, L., Gerónimo López, K.,  
598 et al. (2020). Prenatal food insecurity post Hurricane Maria is associated with decreased  
599 *Veillonella* in the infant gut. *Pediatr. Res.* 88, 917–924. doi:10.1038/s41390-020-0839-0.
- 600 Wasser, C. I., Mercieca, E.-C., Kong, G., Hannan, A. J., McKeown, S. J., Glikmann-Johnston, Y.,  
601 et al. (2020). Gut dysbiosis in Huntington’s disease: associations among gut microbiota,  
602 cognitive performance and clinical outcomes. *Brain Commun.* 2, 1–13.  
603 doi:10.1093/braincomms/fcaa110.
- 604 Wickham, H. (2016). Package ‘ggplot2’: elegant graphics for data analysis. *Springer-Verlag*  
605 *New York.* doi 10, 970–978.
- 606 Yilmaz, P., Parfrey, L. W., Yarza, P., Gerken, J., Pruesse, E., Quast, C., et al. (2014). The  
607 SILVA and “All-species Living Tree Project (LTP)” taxonomic frameworks. *Nucleic Acids*  
608 *Res.* 42, D643-8. doi:10.1093/nar/gkt1209.
- 609 Yuan, M., and Lin, Y. (2006). Model selection and estimation in regression with grouped  
610 variables. *J. R. Stat. Soc. Ser. B (Statistical Methodol.* 68, 49–67. doi:10.1111/j.1467-  
611 9868.2005.00532.x.
- 612 Zhao, T., Griffith, T., Zhang, Y., Li, H., Hussain, N., Lester, B., et al. (2022). Early-life factors  
613 associated with neurobehavioral outcomes in preterm infants during NICU hospitalization.  
614 *Pediatr. Res.* doi:10.1038/s41390-022-02021-y.

615 **Figure Legends**

616 **Figure 1**

617 Relative abundance of gut microbiota and 3 sub-scales for each infant

- 618 a. Relative abundance of gut microbiota for each infant
- 619 b. Standardized scores of NNNS subscales for each infant

620 The infants were ordered according to the standardized score of NSTRESS scores. A  
621 standardized score of NNNS subscales (NSTRESS, NQMOVE, and NHANDLING) was  
622 generated by dividing the difference between each infant's score and the mean by the standard  
623 deviation. The standardized scores of each these subscales were plotted with the gut microbiome  
624 for each infant.

625 **Figure 2**

626 Control sign and OTUs for NSTRESS

- 628 a. Control sign and NSTRESS
- 629 b. OTUs associated with NSTRESS scores

630 Figure 2 a, the proportions of the signs of the estimated coefficients of the control  
631 variables. Proportions of negative signs were shown as black blocks to the right, and  
632 those of positive signs were shown as light gray blocks to the left. Lower NSTRESS  
633 scores indicated better development, those variables in black indicated association with lower  
634 NSTRESS scores. The red dotted lines show the 90% of bootstrap.

635 Figure 2 b1-6, the estimated time-varying effects of OUT on NSTRESS scores during the NICU  
636 stay.

637 **Figure 3**

639 Control sign and OTUs for NHANDLING

- 640 a. Control sign and NHANDLING
- 641 b. OTUs associated with NHANDLING scores

642 Figure 3 a, the proportions of the signs of the estimated coefficients of the control  
643 variables. Proportions of negative signs were shown as black blocks to the right, and  
644 those of positive signs were shown as light gray blocks to the left. Lower NHANDLING  
645 scores indicated better development, those variables in black indicated association with lower  
646 NHANDLING scores. The red dotted lines show the 90% of bootstrap.

647 Figure 3 b1-6, the estimated time-varying effects of OUT on NSTRESS scores during the NICU  
648 stay.

649 **Figure 4**

651 Control sign and OTUs for NQMOVE

- 652 a. Control sign and NQMOVE
- 653 b. OTUs associated with NQMOVE scores

654 Figure 4 a, the proportions of the signs of the estimated coefficients of the control  
655 variables. Proportions of negative signs were shown as black blocks to the right, and  
656 those of positive signs were shown as light gray blocks to the left. Higher NQMOVE  
657 scores indicated better development, those variables in light gray indicated association with  
658 higher NQMOVE scores. The red dotted lines show the 90% of bootstrap.

659 Figure 4 b, the estimated time-varying effects of OUT on NQMOVE scores during the NICU  
660 stay.

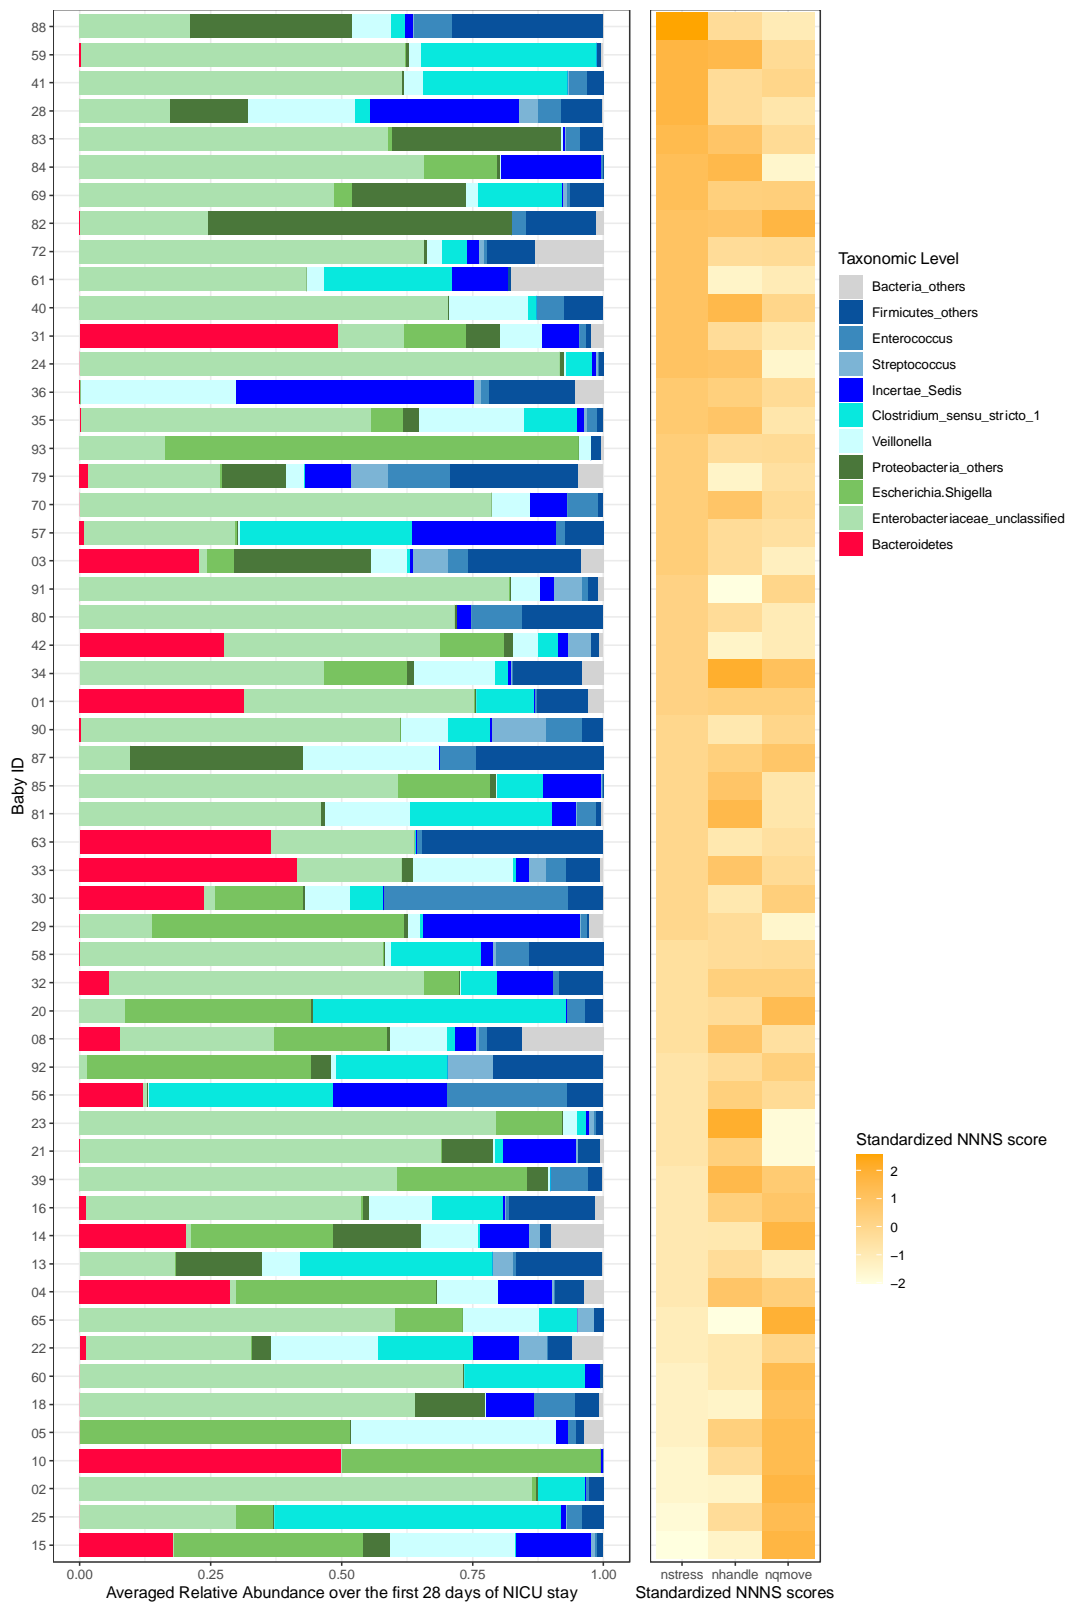

661  
662

Figure 1. Relative abundance of gut microbiota and 3 sub-scales for each infant



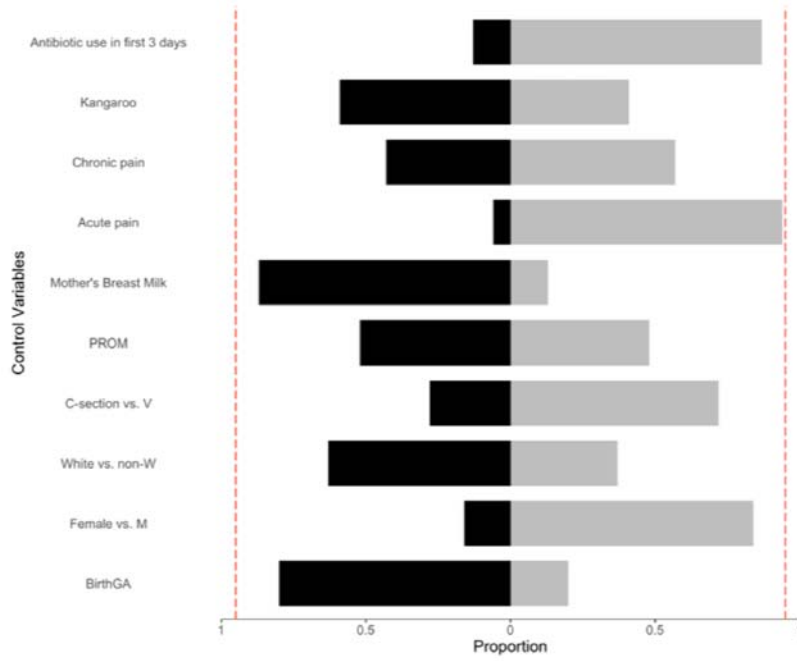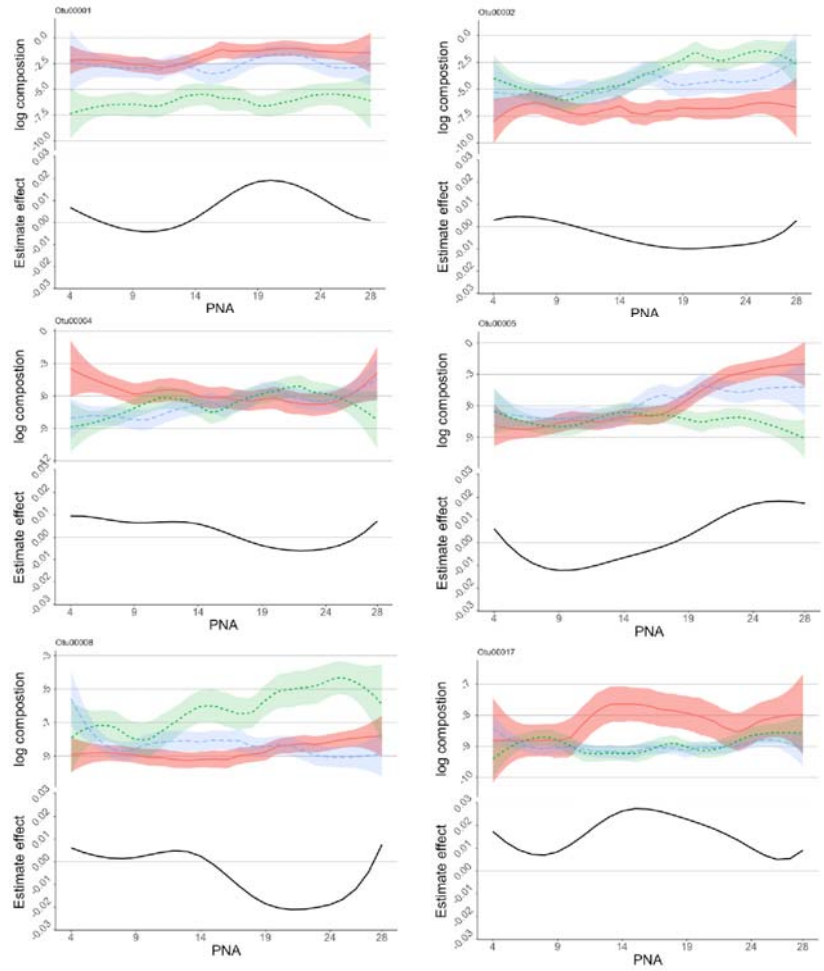

Figure 2. Control sign and OTUs for NSTRESS

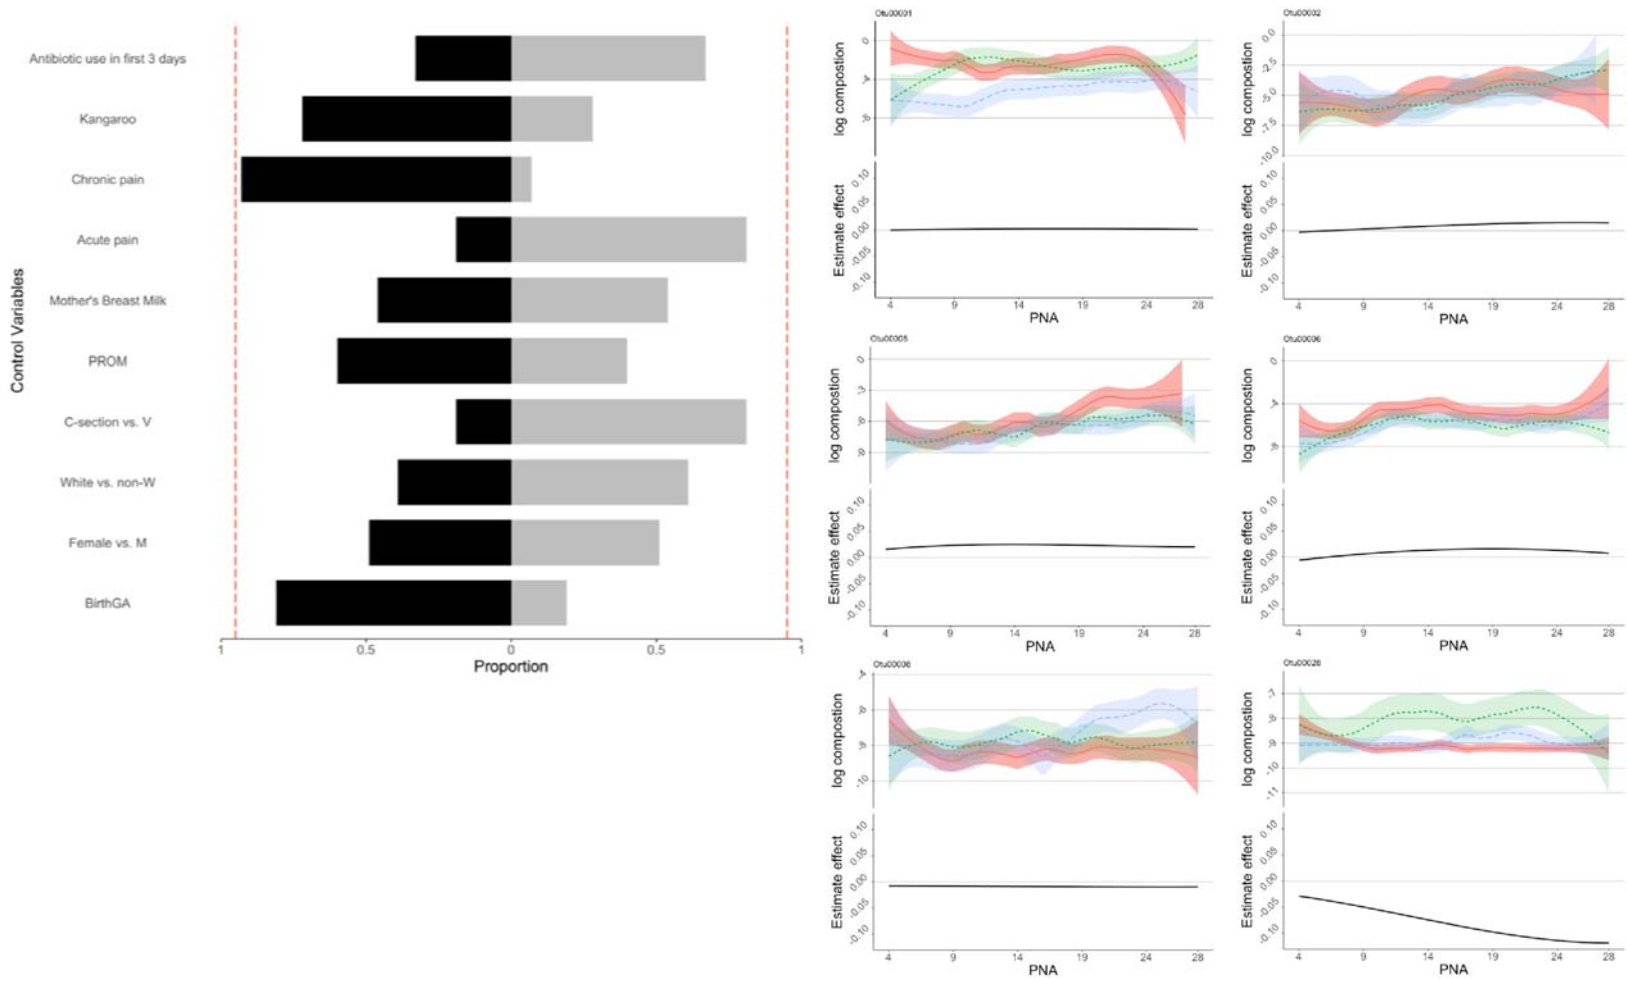

Figure 3. Control sign and OTUs for NHANDLING

666  
667

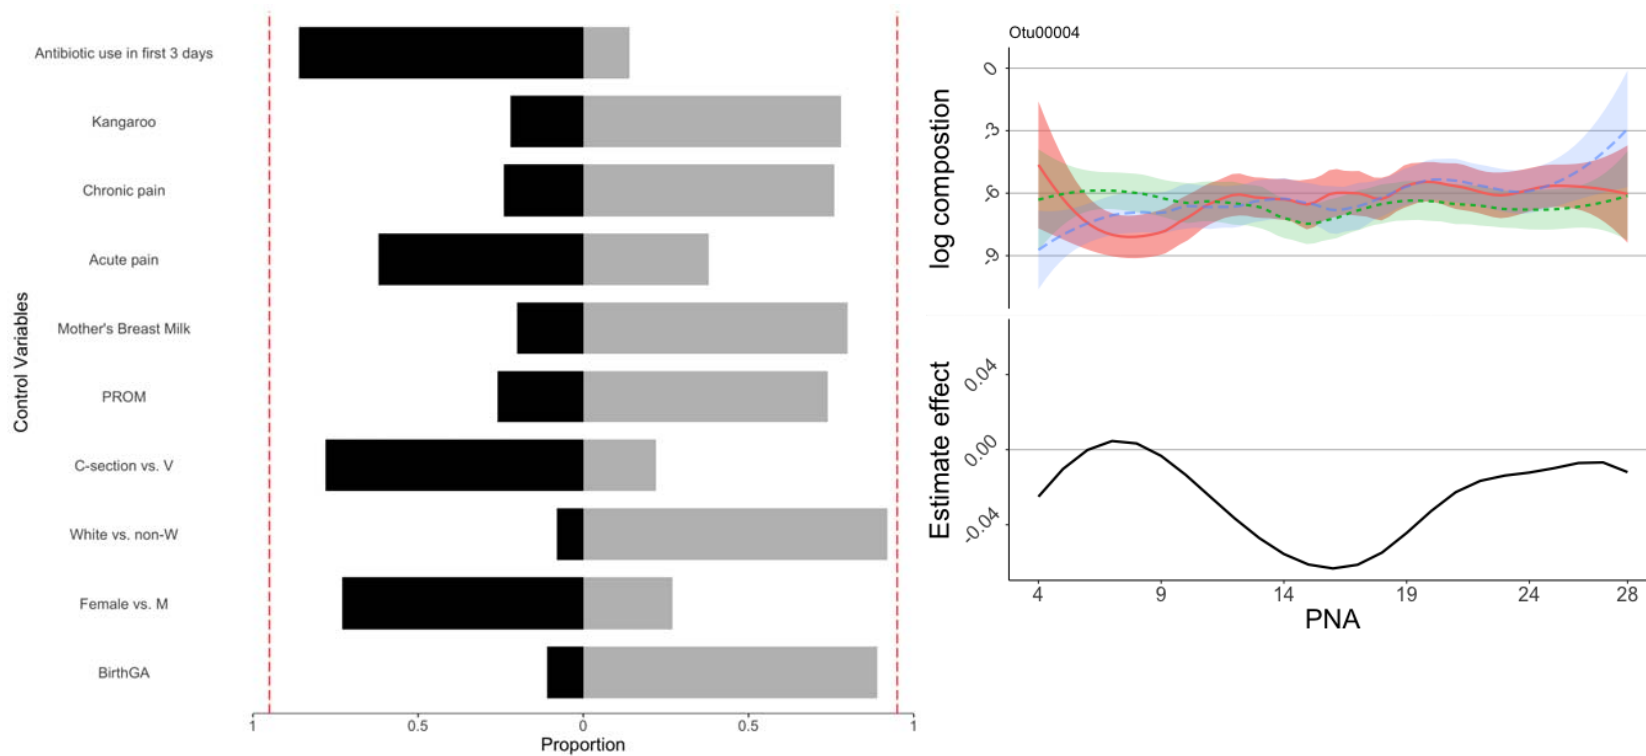

Figure 4. Control sign and OTUs for NQMOVE

668  
669
