# Supplementary material for: The impact of early life experiences and gut microbiota on neurobehavioral development among preterm infants: A longitudinal cohort study
Source: bioRxiv or medRxiv preprint supplement (doi:10.1101/2023.01.04.23284200), 2023-01-07
Supplement: Supplementary file [file media-1.zip]

S Table 3 Estimation of Control Variables

|           | GA     | Female<br>vs. Male | White vs. Non-<br>White | C-section vs.<br>Vaginal | PROM vs.<br>N-PROM | MBM<br>proportion | Acute<br>pain/stress | Chronic<br>pain/stress | kangaroo<br>care | Antibiotics<br>use in the first<br>3 days | Intercept |
|-----------|--------|--------------------|-------------------------|--------------------------|--------------------|-------------------|----------------------|------------------------|------------------|-------------------------------------------|-----------|
| NSTRESS   | -0.012 | 0.019              | -0.007                  | 0.018                    | -0.007             | -0.061            | 0.002                | 0.001                  | -0.001           | 0.048                                     | 0.495     |
| NHANDLING | -0.043 | 0.007              | -0.041                  | 0.103                    | -0.05              | 0.001             | 0.008                | -0.029                 | -0.001           | 0.088                                     | 1.294     |
| NQMOVE    | 0.128  | -0.112             | 0.389                   | -0.199                   | 0.148              | 0.268             | -0.004               | 0.024                  | 0.007            | -0.314                                    | -0.455    |

Note: PROM, Pre-rupture of membrane; MBM, Mother's Breast Milk.
