# Supplementary material for: The impact of early life experiences and gut microbiota on neurobehavioral development among preterm infants: A longitudinal cohort study
Source: bioRxiv or medRxiv preprint supplement (doi:10.1101/2023.01.04.23284200), 2023-01-07

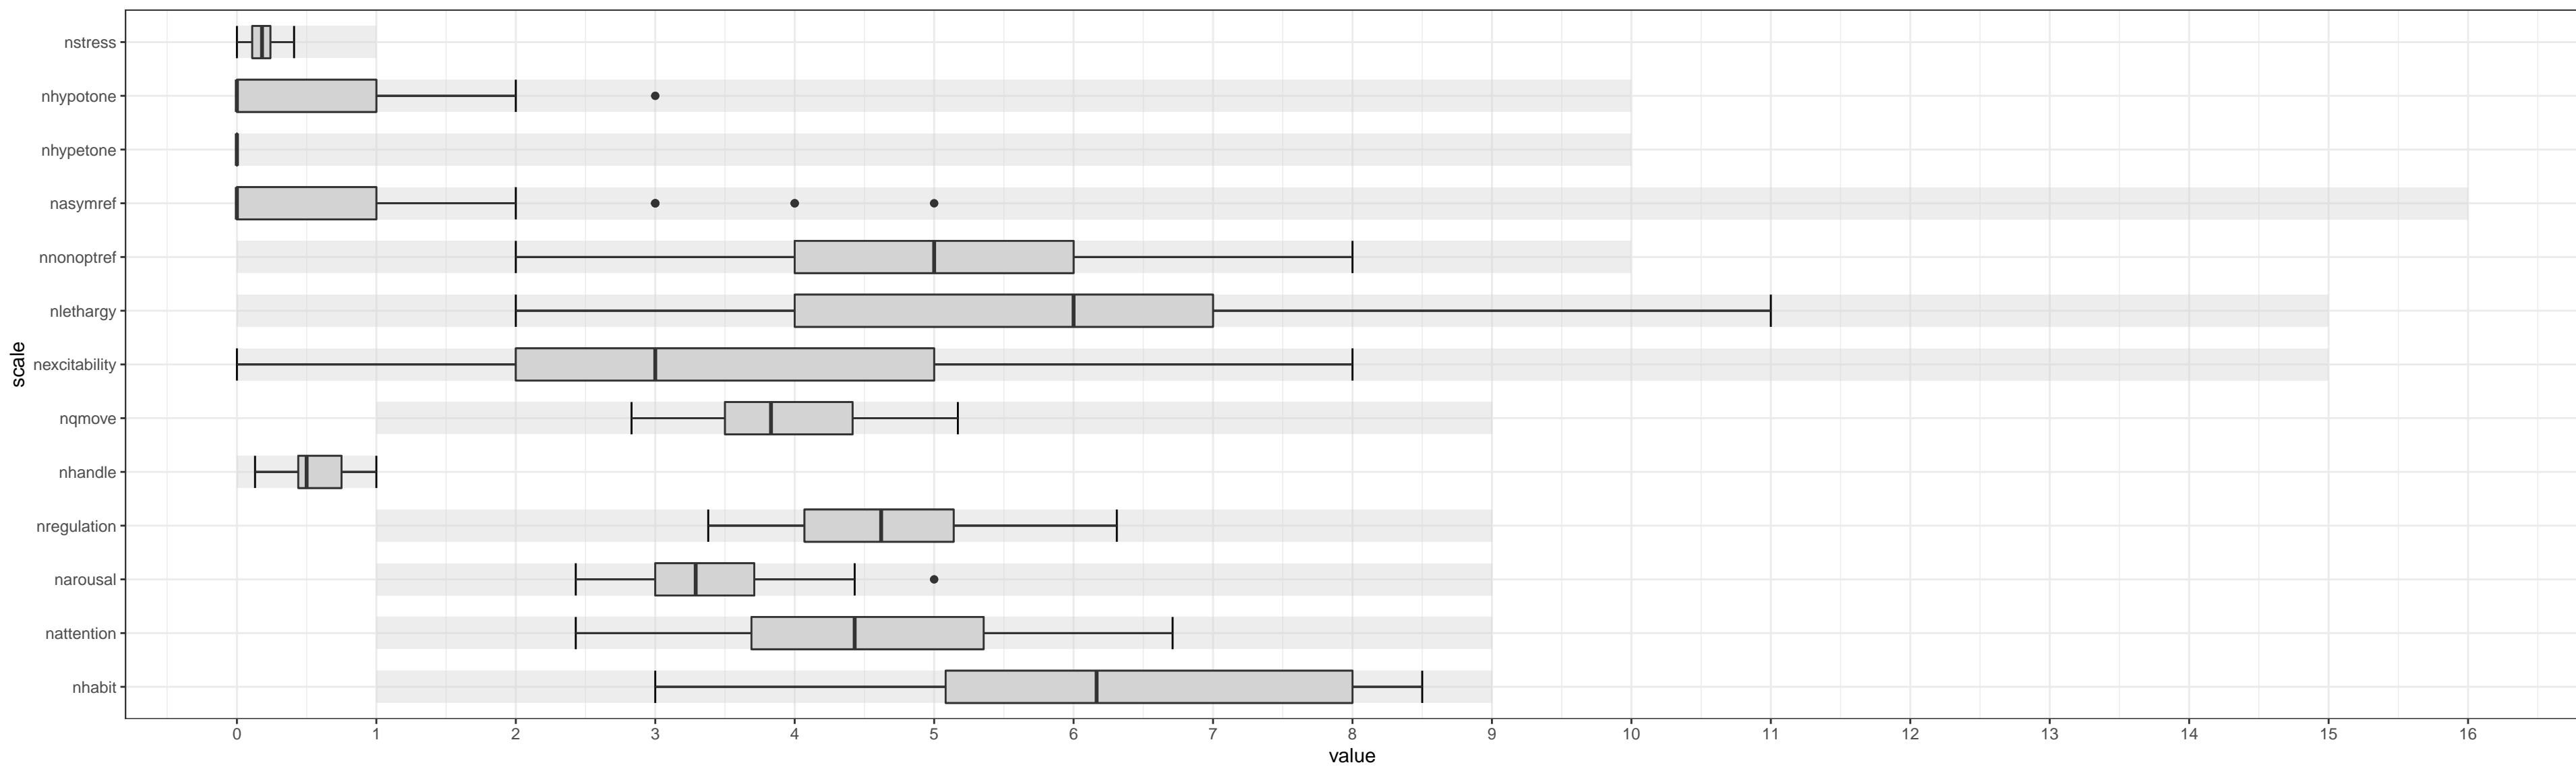

Supplement: Supplementary file [file media-1.zip]
