# Supplementary material for: The impact of early life experiences and gut microbiota on neurobehavioral development among preterm infants: A longitudinal cohort study
Source: bioRxiv or medRxiv preprint supplement (doi:10.1101/2023.01.04.23284200), 2023-01-07

Daily Averaged Proportions of Mother's Breast Milk Intake

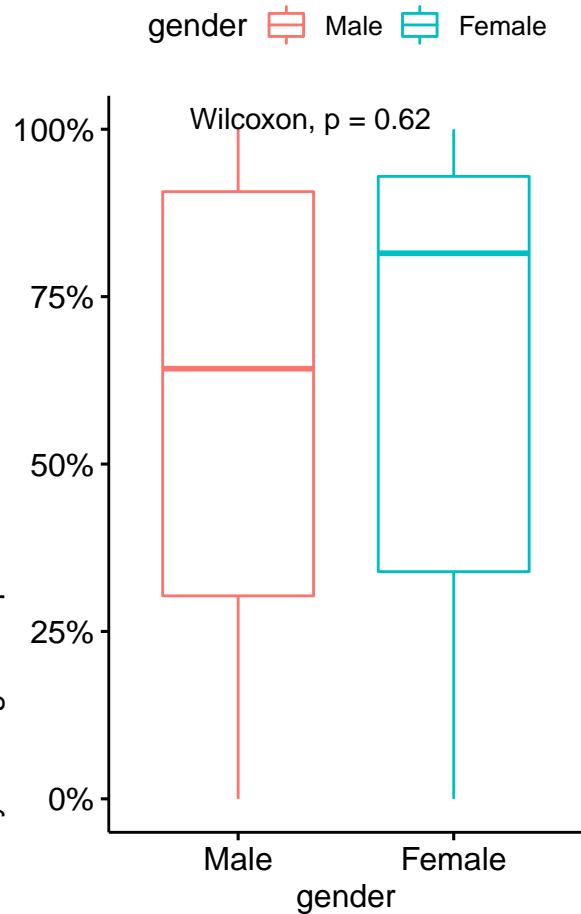

Daily Averaged Weighted Frequencies of Acute Painful Events

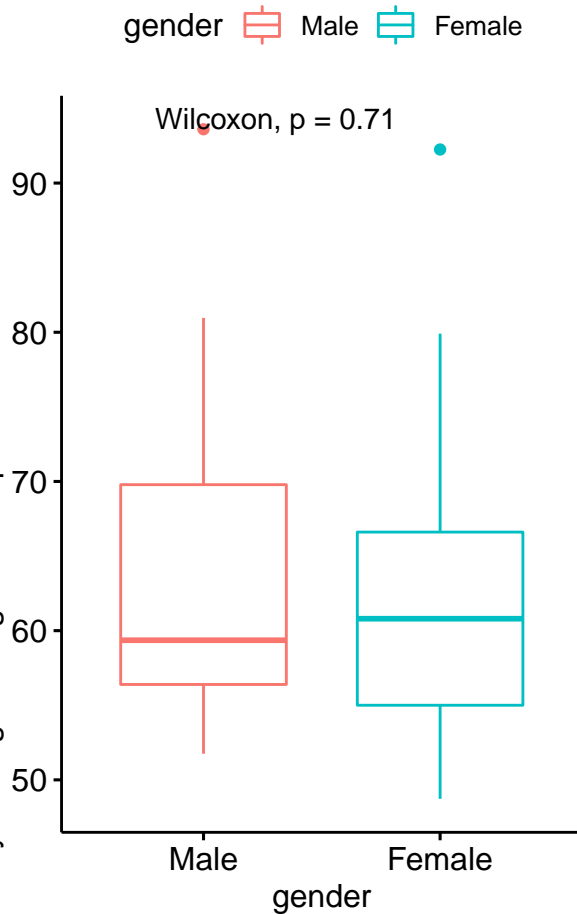

Daily Averaged Weighted Hours of Chronic Painful Events

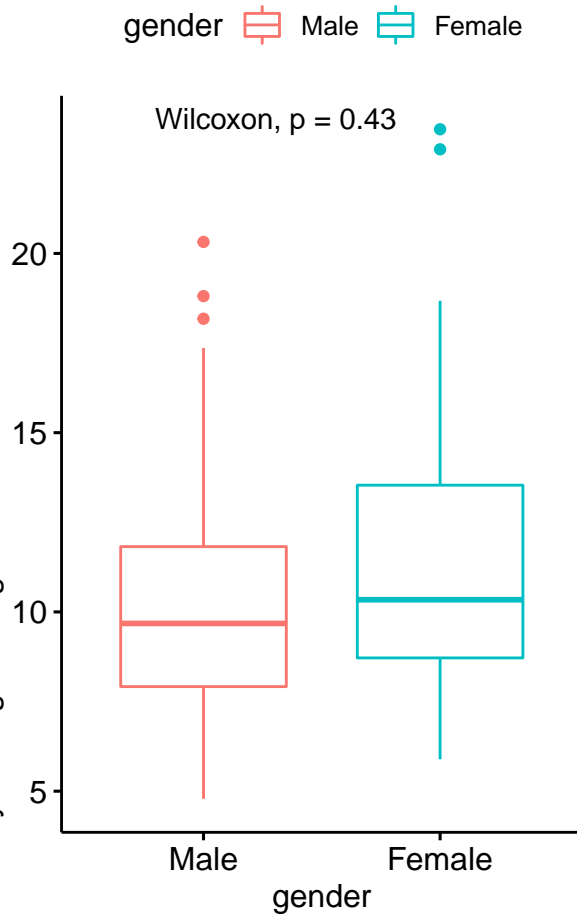

Supplement: Supplementary file [file media-1.zip]
